# Supplementary material
Source: MDPI journal article supplement (https://www.mdpi.com/2077-0472/11/11/1104)
Supplement: s1 [file s1]

## Supplementary Material

**Table S1.** The results of statistical tests for model-1. The red-shaded cells show inseparability between classes ( $p > 0.05$ ).

| Test                                   | Result (p-Value/Significance Value) |         |         |      |      |
|----------------------------------------|-------------------------------------|---------|---------|------|------|
| Kruskal-Wallis H-Test                  | 2.9e-54                             |         |         |      |      |
| Paired samples T-test                  |                                     | 1       | 2       | 3    | 4    |
|                                        | 2                                   | 0.02    | -       | -    | -    |
|                                        | 3                                   | 8.2e-19 | 2.1e-17 | -    | -    |
|                                        | 4                                   | 1.8e-21 | 5.8e-16 | 0.60 | -    |
|                                        | 5                                   | 2.6e-20 | 1.2e-16 | 0.63 | 0.95 |
| Paired samples T-test<br>(log of data) |                                     | 1       | 2       | 3    | 4    |
|                                        | 2                                   | 0.00    | -       | -    | -    |
|                                        | 3                                   | 7.9e-13 | 1.2e-16 | -    | -    |
|                                        | 4                                   | 1.4e-14 | 1.8e-14 | 0.86 | -    |
|                                        | 5                                   | 5.8e-13 | 7.3e-13 | 0.80 | 0.70 |
| Wilcoxon signed-rank test              |                                     | 1       | 2       | 3    | 4    |
|                                        | 2                                   | 0.08    | -       | -    | -    |
|                                        | 3                                   | 1.9e-17 | 1.5e15  | -    | -    |
|                                        | 4                                   | 1.8e-18 | 3.2e-14 | 0.34 | -    |
|                                        | 5                                   | 1.5e-18 | 5.3e-15 | 0.08 | 0.77 |

**Table S2.** The results of statistical test for model-2. The red-shaded colour follows the description from Table 2.

| Test                                   | Result (p-Value/Significance Value) |         |         |         |      |
|----------------------------------------|-------------------------------------|---------|---------|---------|------|
| Kruskal-Wallis H-Test                  | 3.2e-117                            |         |         |         |      |
| Paired samples T-test                  |                                     | 1       | 2       | 3       | 4    |
|                                        | 2                                   | 9.9e-17 | -       | -       | -    |
|                                        | 3                                   | 3.9e-16 | 0.37    | -       | -    |
|                                        | 4                                   | 1.1e-45 | 1.5e-19 | 5.4e-16 | -    |
|                                        | 5                                   | 8.0e-50 | 3.8e-24 | 1.8e-21 | 0.01 |
| Paired samples T-test<br>(log of data) |                                     | 1       | 2       | 3       | 4    |
|                                        | 2                                   | 1.3e-16 | -       | -       | -    |
|                                        | 3                                   | 1.1e-15 | 0.46    | -       | -    |
|                                        | 4                                   | 2.8e-41 | 2.2e-18 | 9.1e-15 | -    |
|                                        | 5                                   | 3.9e-43 | 6.0e-22 | 6.1e-19 | 0.01 |
| Wilcoxon signed-rank test              |                                     | 1       | 2       | 3       | 4    |
|                                        | 2                                   | 2.8e-12 | -       | -       | -    |
|                                        | 3                                   | 9.0e-12 | 0.55    | -       | -    |
|                                        | 4                                   | 2.5e-14 | 4.2e-13 | 6.8e-12 | -    |
|                                        | 5                                   | 2.5e-14 | 3.1e-14 | 3.5e-14 | 0.02 |

**Table S3.** The results of statistical tests for model-3. The red-shaded colour follows the description from Table 2.

| Test                                   | Result (p-Value/Significance Value) |         |         |         |      |
|----------------------------------------|-------------------------------------|---------|---------|---------|------|
| Kruskal-Wallis H-Test                  | 1.2e-102                            |         |         |         |      |
| Paired samples T-test                  |                                     | 1       | 2       | 3       | 4    |
|                                        | 2                                   | 0.00    | -       | -       | -    |
|                                        | 3                                   | 1.7e-46 | 7.5e-46 | -       | -    |
|                                        | 4                                   | 1.2e-44 | 2.4e-48 | 0.00    | -    |
|                                        | 5                                   | 6.3e-54 | 8.5e-55 | 6.0e-09 | 0.37 |
| Paired samples T-test<br>(log of data) |                                     | 1       | 2       | 3       | 4    |
|                                        | 2                                   | 0.00    | -       | -       | -    |
|                                        | 3                                   | 3.3e-30 | 3.4e-40 | -       | -    |
|                                        | 4                                   | 1.6e-30 | 2.9e-41 | 0.01    | -    |
|                                        | 5                                   | 4.7e-35 | 6.0e-48 | 3.5e-08 | 0.18 |

| Wilcoxon signed-rank test |   | 1       | 2       | 3       | 4    |
|---------------------------|---|---------|---------|---------|------|
|                           | 2 | 0.00    | -       | -       | -    |
|                           | 3 | 1.4e-31 | 2.8e-31 | -       | -    |
|                           | 4 | 4.6e-29 | 2.9e-30 | 3.5e-06 | -    |
|                           | 5 | 1.2e-32 | 4.6e-33 | 4.2e-09 | 0.99 |

**Table S4.** The results of statistical tests for model-1 for fertilization at 25 March 2020.

| Test                                   | Result (p-Value/Significance Value) |         |         |         |         |
|----------------------------------------|-------------------------------------|---------|---------|---------|---------|
| Kruskal-Wallis H-Test                  | 3.3e-139                            |         |         |         |         |
| Paired samples T-test                  |                                     | 1       | 2       | 3       | 4       |
|                                        | 2                                   | 1.4e-38 | -       | -       | -       |
|                                        | 3                                   | 3.6e-71 | 9.8e-14 | -       | -       |
|                                        | 4                                   | 3.2e-77 | 1.2e-26 | 4.0e-07 | -       |
|                                        | 5                                   | 9.2e-94 | 1.3e-41 | 1.3e-25 | 9.4e-10 |
| Paired samples T-test<br>(log of data) |                                     | 1       | 2       | 3       | 4       |
|                                        | 2                                   | 3.6e-25 | -       | -       | -       |
|                                        | 3                                   | 3.0e-43 | 3.9e-12 | -       | -       |
|                                        | 4                                   | 2.1e-46 | 1.2e-20 | 2.6e-05 | -       |
|                                        | 5                                   | 7.4e-54 | 4.4e-31 | 4.9e-20 | 2.0e-07 |
| Wilcoxon signed-rank test              |                                     | 1       | 2       | 3       | 4       |
|                                        | 2                                   | 2.7e-27 | -       | -       | -       |
|                                        | 3                                   | 1.3e-33 | 1.6e-12 | -       | -       |
|                                        | 4                                   | 5.0e-34 | 2.6e-24 | 8.3e-08 | -       |
|                                        | 5                                   | 2.1e-34 | 2.2e-29 | 4.8e-24 | 7.4e-12 |

**Table S5.** The results of statistical tests for model-1 for fertilization at 21 April 2020.

| Test                                   | Result (p-Value/Significance Value) |         |         |         |      |
|----------------------------------------|-------------------------------------|---------|---------|---------|------|
| Kruskal-Wallis H-Test                  | 3.9e-183                            |         |         |         |      |
| Paired samples T-test                  |                                     | 1       | 2       | 3       | 4    |
|                                        | 2                                   | 2.3e-51 | -       | -       | -    |
|                                        | 3                                   | 1.9e-86 | 1.1e-19 | -       | -    |
|                                        | 4                                   | 1.7e-97 | 6.0e-31 | 3.6e-08 | -    |
|                                        | 5                                   | 1.1e-97 | 1.1e-37 | 1.3e-11 | 0.01 |
| Paired samples T-test<br>(log of data) |                                     | 1       | 2       | 3       | 4    |
|                                        | 2                                   | 4.8e-35 | -       | -       | -    |
|                                        | 3                                   | 1.1e-50 | 1.8e-16 | -       | -    |
|                                        | 4                                   | 4.4e-56 | 8.7e-26 | 2.5e-07 | -    |
|                                        | 5                                   | 1.2e-57 | 5.7e-30 | 2.2e-09 | 0.02 |
| Wilcoxon signed-rank test              |                                     | 1       | 2       | 3       | 4    |
|                                        | 2                                   | 1.5e-31 | -       | -       | -    |
|                                        | 3                                   | 3.9e-34 | 2.8e-18 | -       | -    |
|                                        | 4                                   | 1.4e-34 | 1.2e-26 | 1.1e-07 | -    |
|                                        | 5                                   | 1.4e-34 | 9.6e-29 | 2.1e-12 | 0.00 |

**Table S6.** The results of statistical tests for model-3 for fertilization at 25 March 2020.

| Test                                   | Result (p-Value/Significance Value) |          |         |         |         |
|----------------------------------------|-------------------------------------|----------|---------|---------|---------|
| Kruskal-Wallis H-Test                  | 3.8e-196                            |          |         |         |         |
| Paired samples T-test                  |                                     | 1        | 2       | 3       | 4       |
|                                        | 2                                   | 1.3e-43  | -       | -       | -       |
|                                        | 3                                   | 5.9e-96  | 7.6e-24 | -       | -       |
|                                        | 4                                   | 1.9e-100 | 9.3e-38 | 1.5e-08 | -       |
|                                        | 5                                   | 1.4e-101 | 2.5e-46 | 4.1e-18 | 4.3e-06 |
| Paired samples T-test<br>(log of data) |                                     | 1        | 2       | 3       | 4       |
|                                        | 2                                   | 7.7e-42  | -       | -       | -       |
|                                        | 3                                   | 3.0e-87  | 1.6e-21 | -       | -       |
|                                        | 4                                   | 1.0e-92  | 3.6e-34 | 2.4e-07 | -       |
|                                        | 5                                   | 6.7e-93  | 1.6e-40 | 1.4e-14 | 8.4e-05 |

| Wilcoxon signed-rank test |   | 1       | 2       | 3       | 4       |
|---------------------------|---|---------|---------|---------|---------|
|                           | 2 | 7.5e-30 | -       | -       | -       |
|                           | 3 | 1.6e-34 | 8.6e-21 | -       | -       |
|                           | 4 | 1.5e-34 | 2.1e-28 | 2.8e-09 | -       |
|                           | 5 | 1.7e-34 | 1.4e-29 | 2.0e-19 | 2.0e-08 |

**Table S7.** The results of statistical tests for model-3 for fertilization at 21 April 2020. The red-shaded colour follows the description from Table 2.

| Test                                   | Result (p-Value/Significance Value) |         |         |         |         |
|----------------------------------------|-------------------------------------|---------|---------|---------|---------|
| Kruskal-Wallis H-Test                  | 1.0e-189                            |         |         |         |         |
| Paired samples T-test                  |                                     | 1       | 2       | 3       | 4       |
|                                        | 2                                   | 2.2e-39 | -       | -       | -       |
|                                        | 3                                   | 1.5e-72 | 5.6e-22 | -       | -       |
|                                        | 4                                   | 4.3e-93 | 2.1e-29 | 0.78    | -       |
|                                        | 5                                   | 1.2e-83 | 4.9e-38 | 1.4e-08 | 2.8e-13 |
| Paired samples T-test<br>(log of data) |                                     | 1       | 2       | 3       | 4       |
|                                        | 2                                   | 1.2e-38 | -       | -       | -       |
|                                        | 3                                   | 2.2e-69 | 2.1e-20 | -       | -       |
|                                        | 4                                   | 7.2e-80 | 1.5e-27 | 0.73    | -       |
|                                        | 5                                   | 2.2e-76 | 2.2e-33 | 4.5e-07 | 7.7e-10 |
| Wilcoxon signed-rank test              |                                     | 1       | 2       | 3       | 4       |
|                                        | 2                                   | 3.5e-24 | -       | -       | -       |
|                                        | 3                                   | 2.4e-26 | 2.5e-17 | -       | -       |
|                                        | 4                                   | 2.3e-26 | 5.1e-22 | 0.08    | -       |
|                                        | 5                                   | 2.8e-26 | 3.3e-23 | 4.8e-11 | 2.4e-15 |
